# Supplementary material for: Differences in Bacterial Communities and Pathogen Indicators of Raw and Lagoon-Stabilized Farm Dairy Effluents
Source: MDPI journal article supplement (doi:10.3390/microorganisms12020305), 2024-01-31
Supplement: s1 [file s1]

## Supplementary data

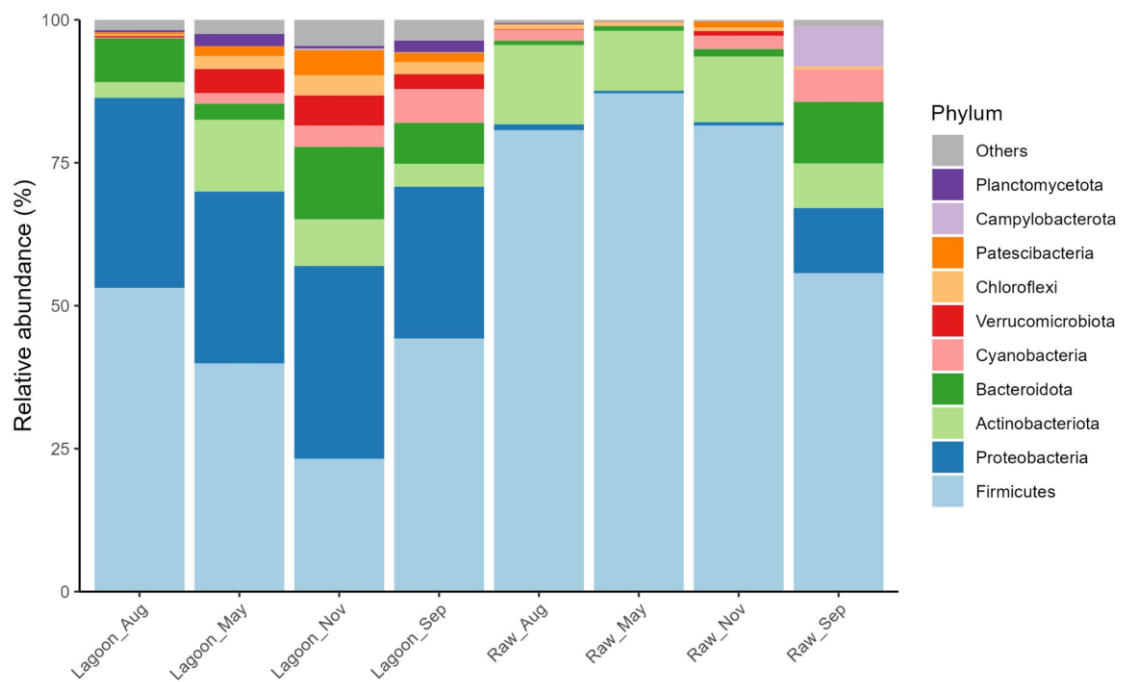

**Figure S1.** Relative abundances of the main bacterial phyla in Lagoon and Raw dairy effluents at four sampling dates: August, May, November, September.

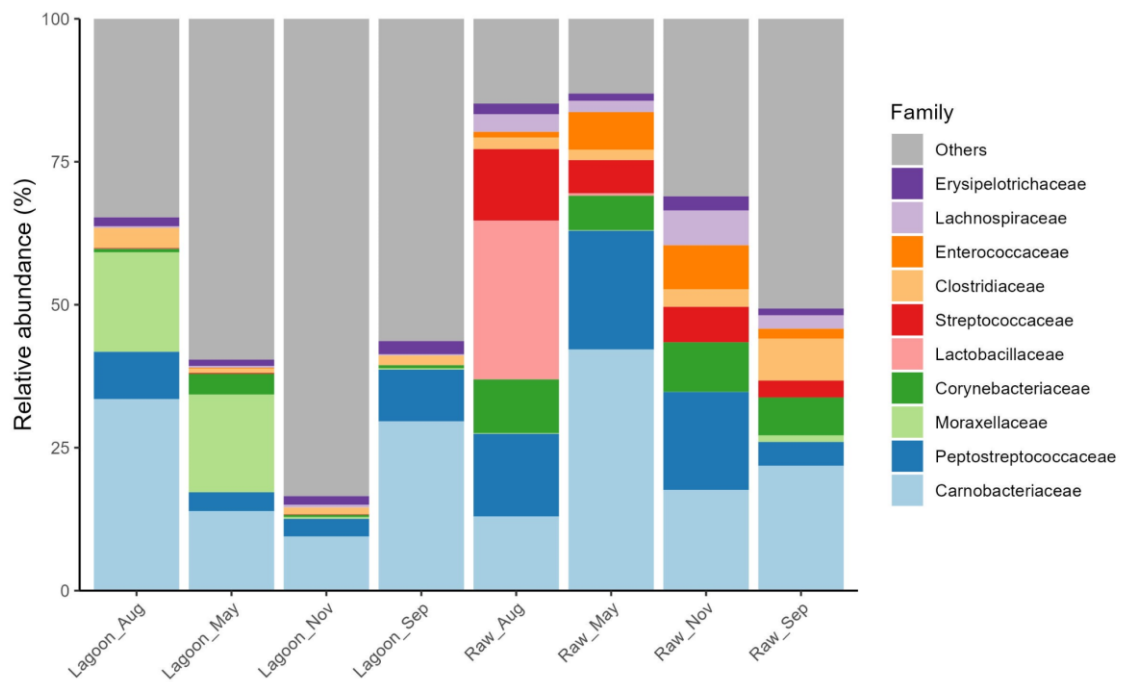

**Figure S2.** Relative abundances of the main bacterial families in Lagoon and Raw dairy effluents at four sampling dates: August, May, November, September.

**Table S1.** Seasonal variation in physicochemical characteristics of the Farm Dairy Effluents, obtained immediately after washing off the milking parlor (Raw) or from the lagoon storage system (Lagoon) ( $n=3\pm$  S.E).

| (mg L <sup>-1</sup> ) |          |           |                             |          |           |           |         |                                 |        |                |                 |                  |                  |
|-----------------------|----------|-----------|-----------------------------|----------|-----------|-----------|---------|---------------------------------|--------|----------------|-----------------|------------------|------------------|
| Months                | Effluent | pH        | CE<br>(mS m <sup>-1</sup> ) | TS (%)   | SS (%)    | Corg      | TKN     | NH <sub>4</sub> <sup>+</sup> -N | P      | K <sup>+</sup> | Na <sup>+</sup> | Mg <sup>2+</sup> | Ca <sup>2+</sup> |
| September             | Raw      | 8.5±0.0 a | 2.4±0.0 c                   | 2.3±0.5a | 0.8±0.4a  | 514±80b   | 800±39a | 216±23b                         | 16±1b  | 722±88a        | 217±17a         | 100±26a          | 197±61a          |
| November              |          | 8.2±0.4 a | 6.9±1.2 a                   | 0.8±0.0b | 0.3±1b    | 643±35ab  | 538±11b | 332±47a                         | 84±19a | 436±107b       | 131±28b         | 46±9c            | 76±15b           |
| May                   |          | 7.3±0.0 b | 4.8±0.1 b                   | 0.9±0.0b | 0.6±0.1b  | 736±145ab | 539±9b  | 75±10c                          | 101±5a | 277±21c        | 226±19a         | 73±5b            | 87±5b            |
| August                |          | 6.0±0.0 c | 1.8±0.0 c                   | 0.3±0.0b | 0.1±0.0b  | 890±22a   | 281±17c | 19±1d                           | 19±2b  | 69±4d          | 16±1c           | 8.3±1d           | 15±1c            |
| September             | Lagoon   | 7.7±0.0 b | 2.1±0.1 b                   | 0.3±0.0a | 0.1±0.0b  | 359±12c   | 137±14b | 87±15a                          | 38±1a  | 150±18b        | 144±17a         | 31±4ab           | 48±5a            |
| November              |          | 7.7±0.0 b | 2.3±0.1 b                   | 0.3±0.0a | 0.1±0.0ab | 414±19b   | 95±7c   | 39±1bc                          | 36±3a  | 156±13b        | 75±8b           | 26±3b            | 47±5a            |
| May                   |          | 7.8±0.1 b | 3.8±0.0 a                   | 0.3±0.0a | 0.1±0.0ab | 275±18d   | 88±2c   | 37±1c                           | 24±4b  | 224±27a        | 157±15a         | 38±6a            | 32±6b            |
| August                |          | 8.1±0.0 a | 2.3±0.4 b                   | 0.2±0.0b | 0.2±0.0a  | 573±42a   | 231±5a  | 53±4b                           | 26±2b  | 92±12c         | 52±7b           | 17±2c            | 23±3b            |

**Table S2.** Relationships between bacterial community compositions at genus level and physicochemical properties of farm dairy effluents revealed by Mantel test.

| Variable        | Correlation<br>coefficient | <i>p</i> |
|-----------------|----------------------------|----------|
| pH              | 0.229                      | 0.013    |
| CE              | 0.152                      | 0.106    |
| ST              | 0.344                      | 0.004    |
| SS              | 0.285                      | 0.010    |
| Corg            | 0.299                      | 0.003    |
| Ntot            | 0.508                      | 0.003    |
| Norg            | 0.367                      | 0.003    |
| NH <sub>4</sub> | 0.323                      | 0.003    |
| K               | 0.423                      | 0.003    |
| Na              | 0.181                      | 0.019    |
| Mg              | 0.293                      | 0.005    |
| Ca              | 0.352                      | 0.004    |
| P               | 0.056                      | 0.223    |

$p < 0.05$  indicates significant correlation
